# Supplementary material
Source: PubMed Central journal article supplement (PMC6609981)

SUPPLEMENTARY DATA

**Supplementary Figure S1. Central and peripheral FGF1 transiently reduced food intake.** **A-C**, Daily food intake after q.o.d-subcutaneous injections of FGF1 (filled squares) or vehicle (open squares) in **(A)** control (n = 6), **(b)** DIO (n = 6), and **(c)** *db/db* mice (n = 6). **D-F**, Daily food intake after a single i.c.v. injection of FGF1 or vehicle in **(D)** control (n = 5 for vehicle; n = 6 for FGF1), **(E)** DIO (n = 6), and **(F)** *db/db* mice (n = 8 for vehicle; n = 9 for FGF1). Arrows represent injection time course. Data are expressed as mean ± SEM; p-values determined by two-way ANOVA; \*p<0.05, \*\*p<0.01, \*\*\*p<0.001, \*\*\*\*p<0.0001, #p<0.05 for overall treatment effect.

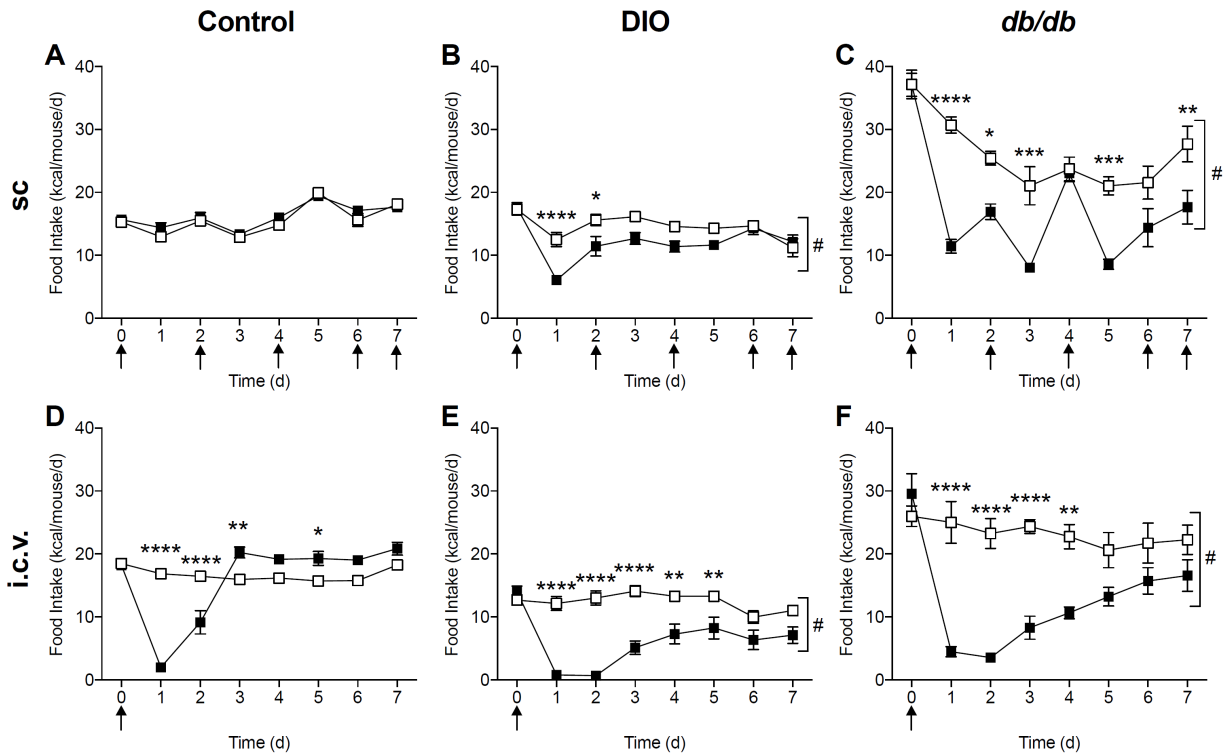

SUPPLEMENTARY DATA

**Supplementary Figure S2. Effects of central and peripheral FGF1 on body weight.** A-C, Daily body weight after q.o.d-subcutaneous injections of FGF1 (filled squares) or vehicle (open squares) in (A) control (n = 6), (B) DIO (n = 6), and (C) *db/db* mice (n = 6). D-F, Daily body weight after a single i.c.v. injection of FGF1 or vehicle in (D) control (n = 5 for vehicle; n = 6 for FGF1), (E) DIO (n = 6), and (F) *db/db* mice (n = 8 for vehicle; n = 9 for FGF1). Arrows represent injection time course. Data are expressed as mean ± SEM; p-values determined by two-way ANOVA; \*\*\*\*p<0.0001, #p<0.05 for overall treatment effect, n.s. not significant.

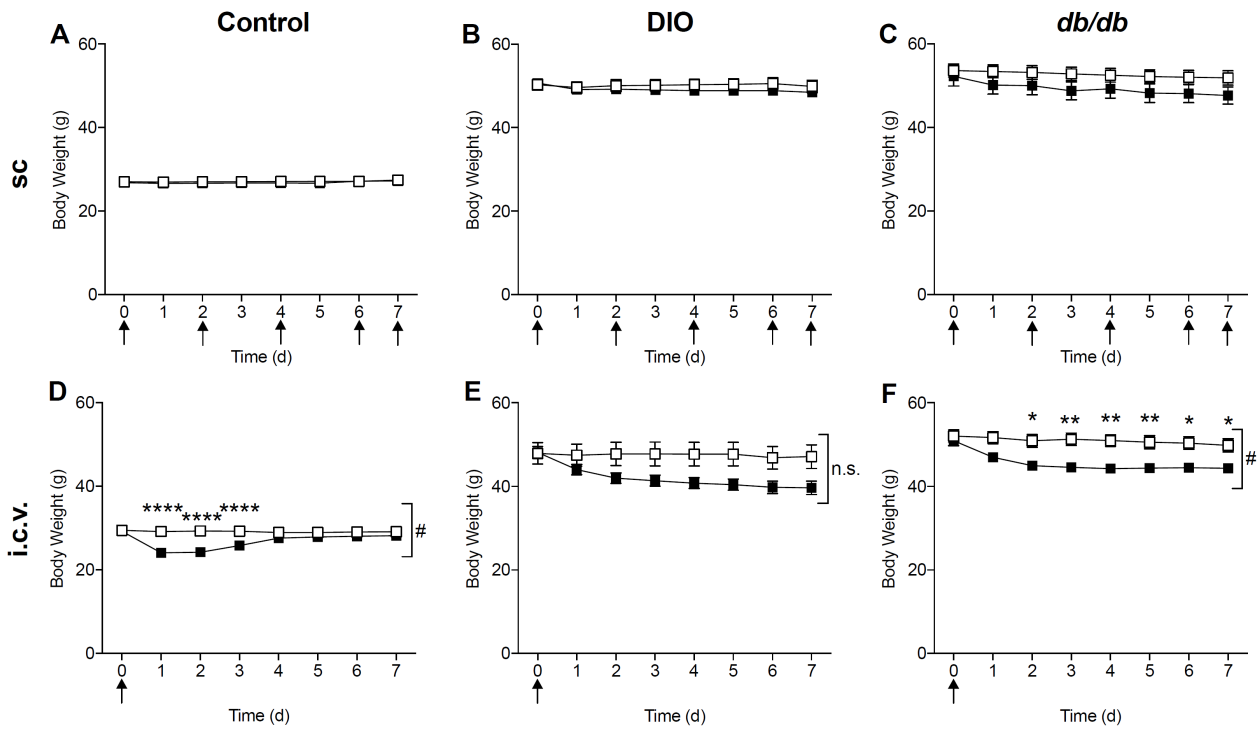

SUPPLEMENTARY DATA

**Supplementary Figure S3. Central, but not peripheral FGF1 altered metabolic rate in DIO mice.** **A-C**, Volume of oxygen consumed ( $VO_2$ ) following **(A)** multiple subcutaneous injections or **(B-C)** a single i.c.v. injection of FGF1 (filled squares) or vehicle (open squares). **D-F**, Respiratory exchange ratio (RER) following **(D)** multiple subcutaneous injections or **(E-F)** a single i.c.v. injection of FGF1 or vehicle. **G-I**, Cumulative food intake following **(G)** multiple subcutaneous injections or **(H-I)** a single i.c.v. injection of FGF1 or vehicle.  $n = 4$  per group. Arrows represent injection time course. Data are expressed as mean  $\pm$  SEM;  $p$ -values determined by two-way ANOVA; # $p < 0.05$  for overall treatment effect.

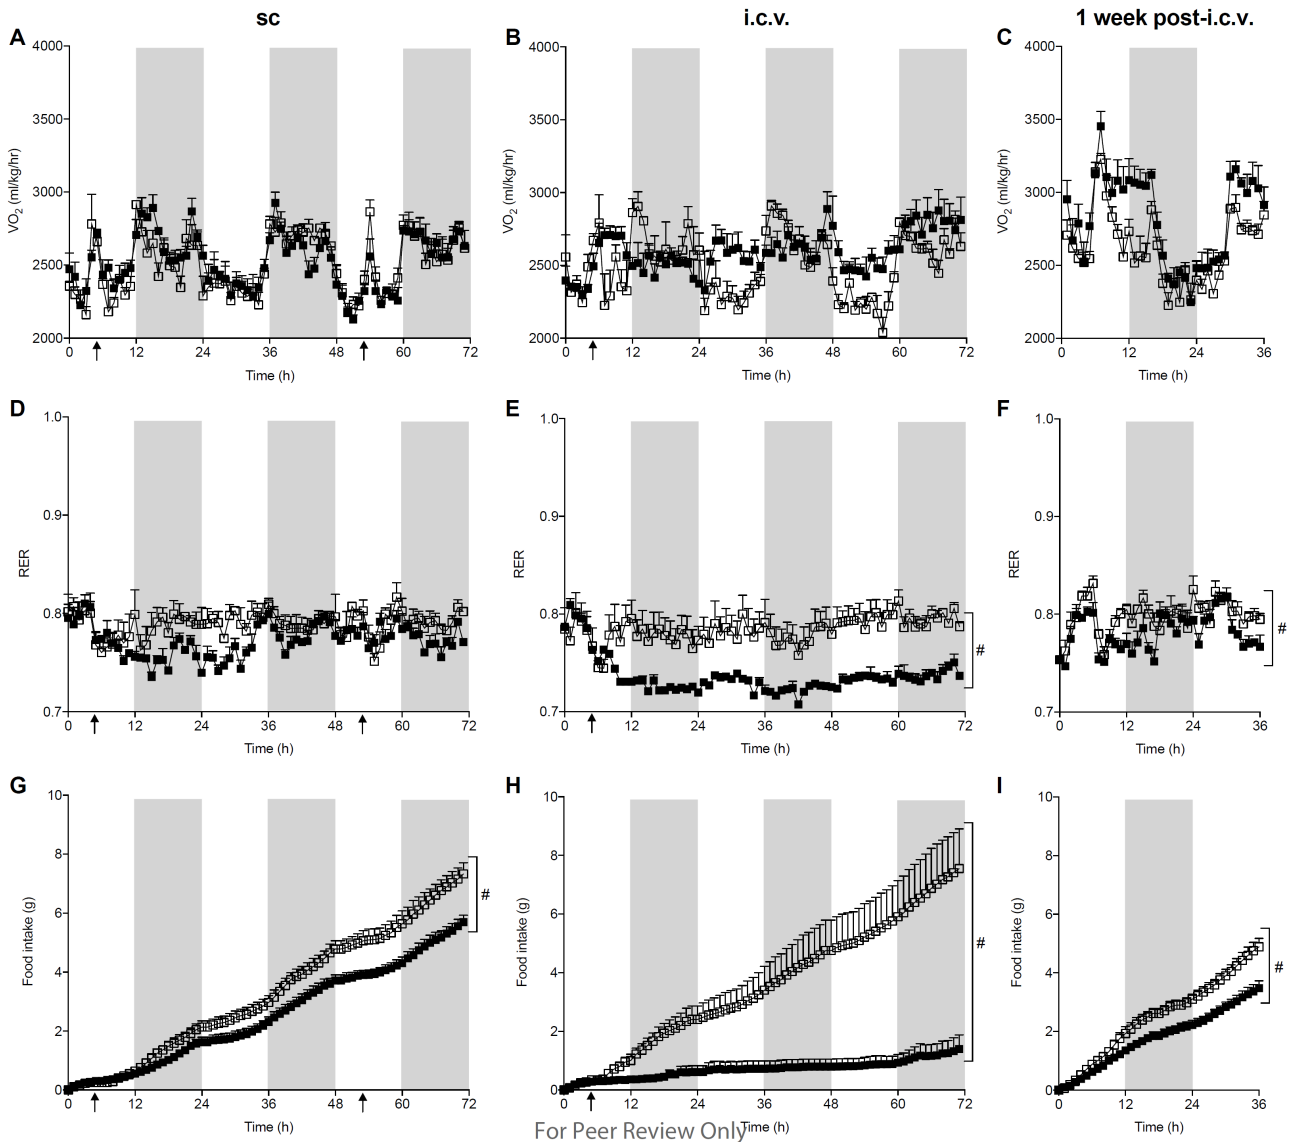

SUPPLEMENTARY DATA

**Supplementary Figure S4. Response to an ipGTT after central and peripheral administration of FGF1 in diabetic and control mouse models.** A-C, Blood glucose levels and plasma insulin during an ipGTT after 6 days of q.o.d.-subcutaneous injections of FGF1 (filled squares) or vehicle (open squares) in fasted (A) control (n = 6), (B) DIO (n = 6), and (C) *db/db* mice (n = 5 for vehicle; n = 6 for FGF1). D-F, Blood glucose levels and plasma insulin during an ipGTT 6 days after a single i.c.v. injection of FGF1 or vehicle in in fasted (D) control (n = 5 for vehicle; n = 6 for FGF1), (E) DIO (n = 6), and (F) *db/db* mice (n = 4). Arrows represent FGF1/vehicle injection, glucose bolus given at time 0. Data are expressed as mean ± SEM; p-values determined by two-way ANOVA; \*p<0.05, #p<0.05 for overall treatment effect.

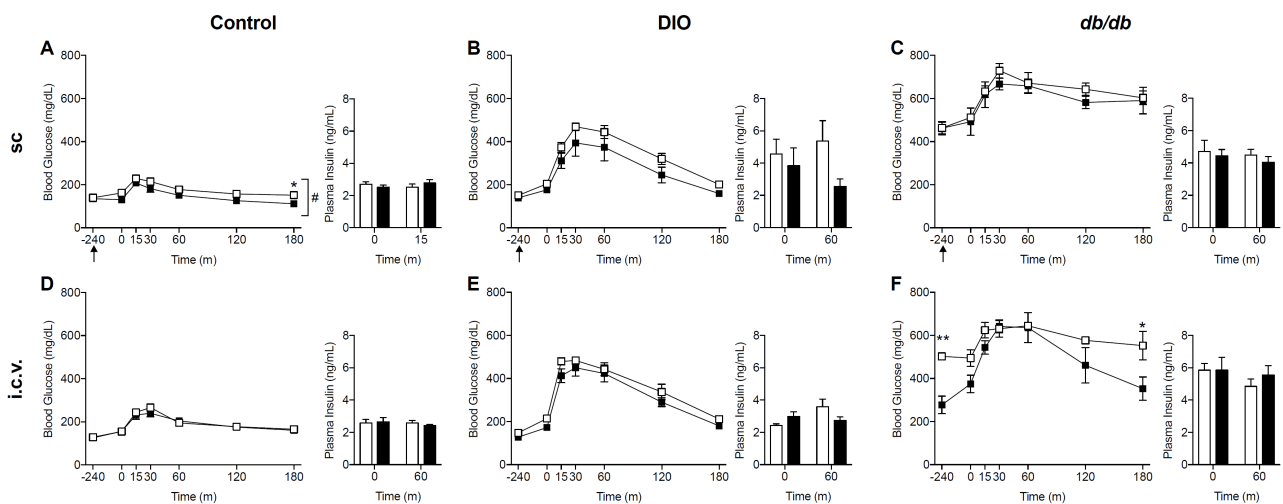

SUPPLEMENTARY DATA

**Supplementary Figure S5. Effects of acute peripheral FGF1 *in vivo* in *db/db* mice.** (A) blood glucose, (B) food intake, and (C) body weight were monitored for 2 hours following a subcutaneous injection of FGF1 (filled squares) or vehicle (open squares) in *db/db* mice. n = 6 per group. Data are expressed as mean  $\pm$  SEM.

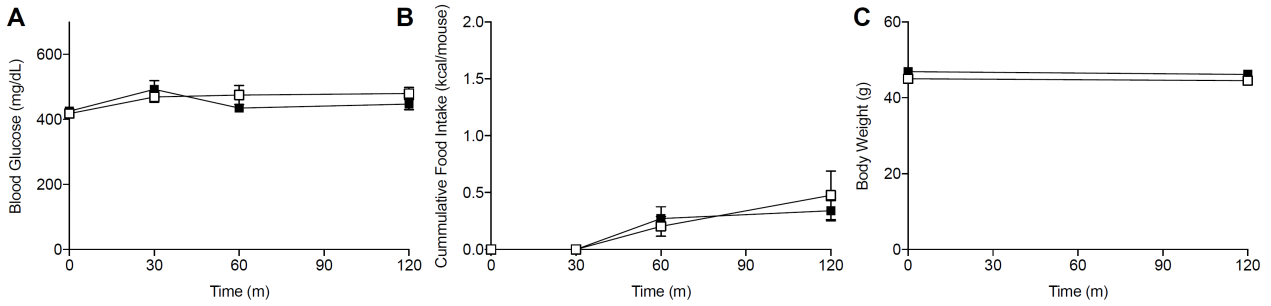

## SUPPLEMENTARY DATA

**Supplementary Figure S6. Acute peripheral and central FGF1 increased *ex vivo* insulin secretion from DIO mouse islets.** **A**, GSIS from DIO islets isolated 2 hours after subcutaneous administration of FGF1 (filled squares) or vehicle (open squares). **B-C**, GSIS from DIO islets isolated (**B**) 2 hours or (**C**) 48 hours after i.c.v. administration of FGF1 or vehicle. Isolated islets were cultured overnight prior to GSIS assay.  $n = 3$  per group for *in vivo* treatment. Data are expressed as mean  $\pm$  SEM; p-values determined by two-way ANOVA; \* $p < 0.05$ , \*\* $p < 0.01$ , \*\*\*\* $p < 0.0001$ , # $p < 0.05$  for overall treatment effect.

SUPPLEMENTARY DATA

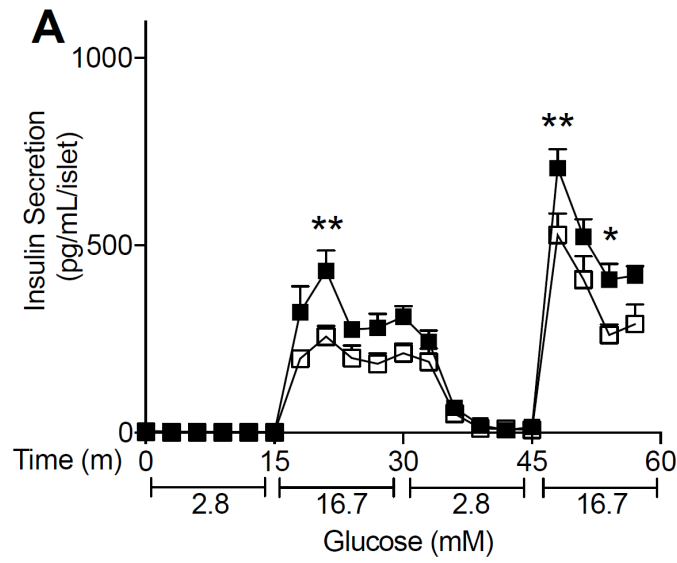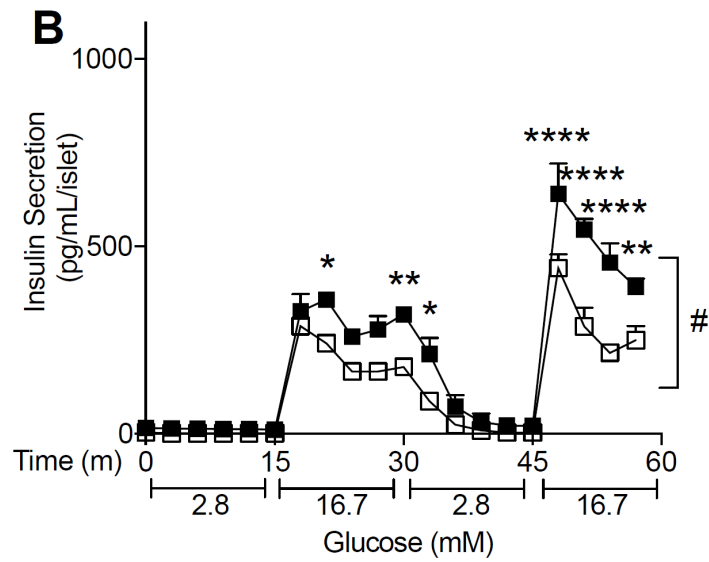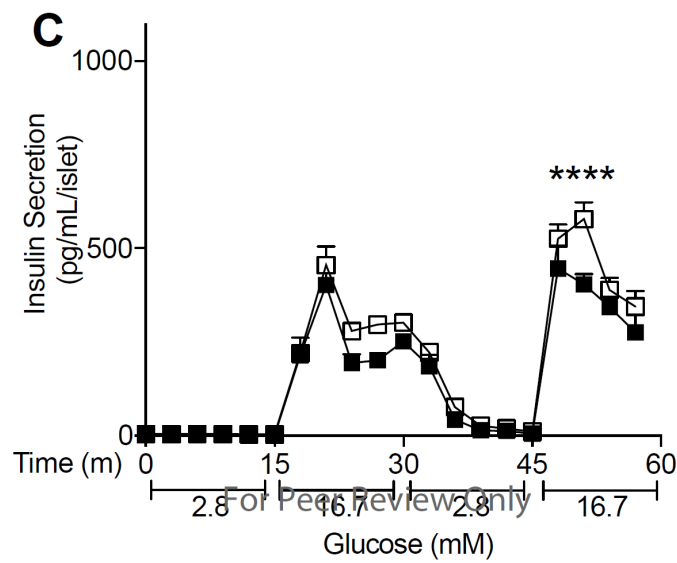

SUPPLEMENTARY DATA

**Supplementary Figure S7. Effect of central and peripheral FGF1 on c-Fos activation in multiple hypothalamic areas.** C-Fos activation 90 minutes after a single subcutaneous or i.c.v. injection of FGF1 (filled bars) or vehicle (open bars) in the (A, D) median eminence (ME), (B, E) arcuate nucleus (ARH), and (C, F) ventromedial nucleus of the hypothalamus (VMH). G, Illustration of criteria for selecting cell populations within the ME, ARH, and VMH. n = 3 per group. Data are expressed as mean ± SEM; p-values determined by unpaired Student's t-test; \*p<0.05, \*\*p<0.01, \*\*\*\*p<0.0001.

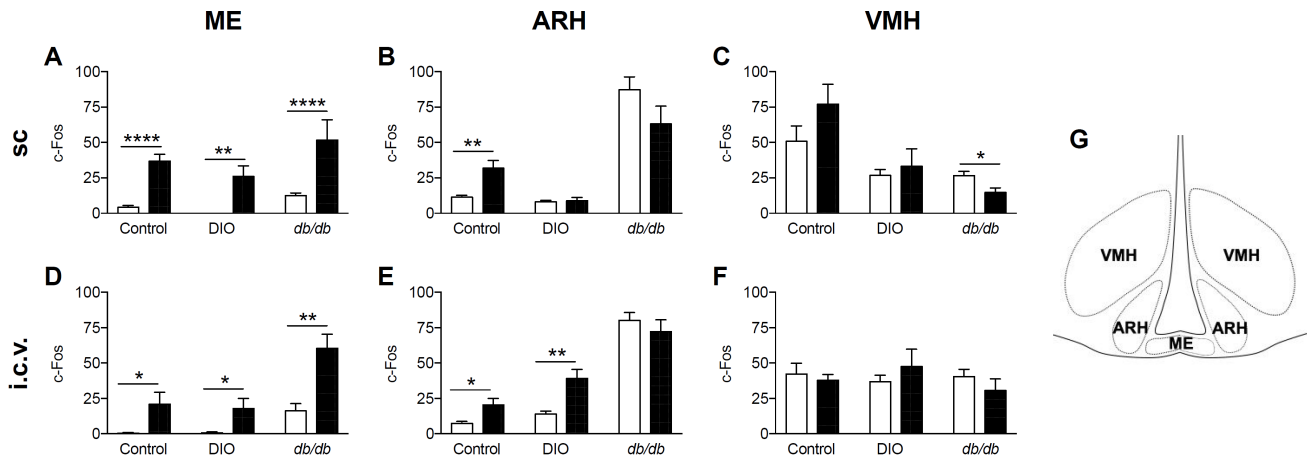



SUPPLEMENTARY DATA

**Supplementary Figure S8.** Colocalization of c-Fos (green) and the  $\alpha$ -tanyocyte-specific marker, S100B (red), 90 minutes after a single (A) subcutaneous or (B) i.c.v. injection of FGF1. DAPI (blue) was used for detection of nuclei.

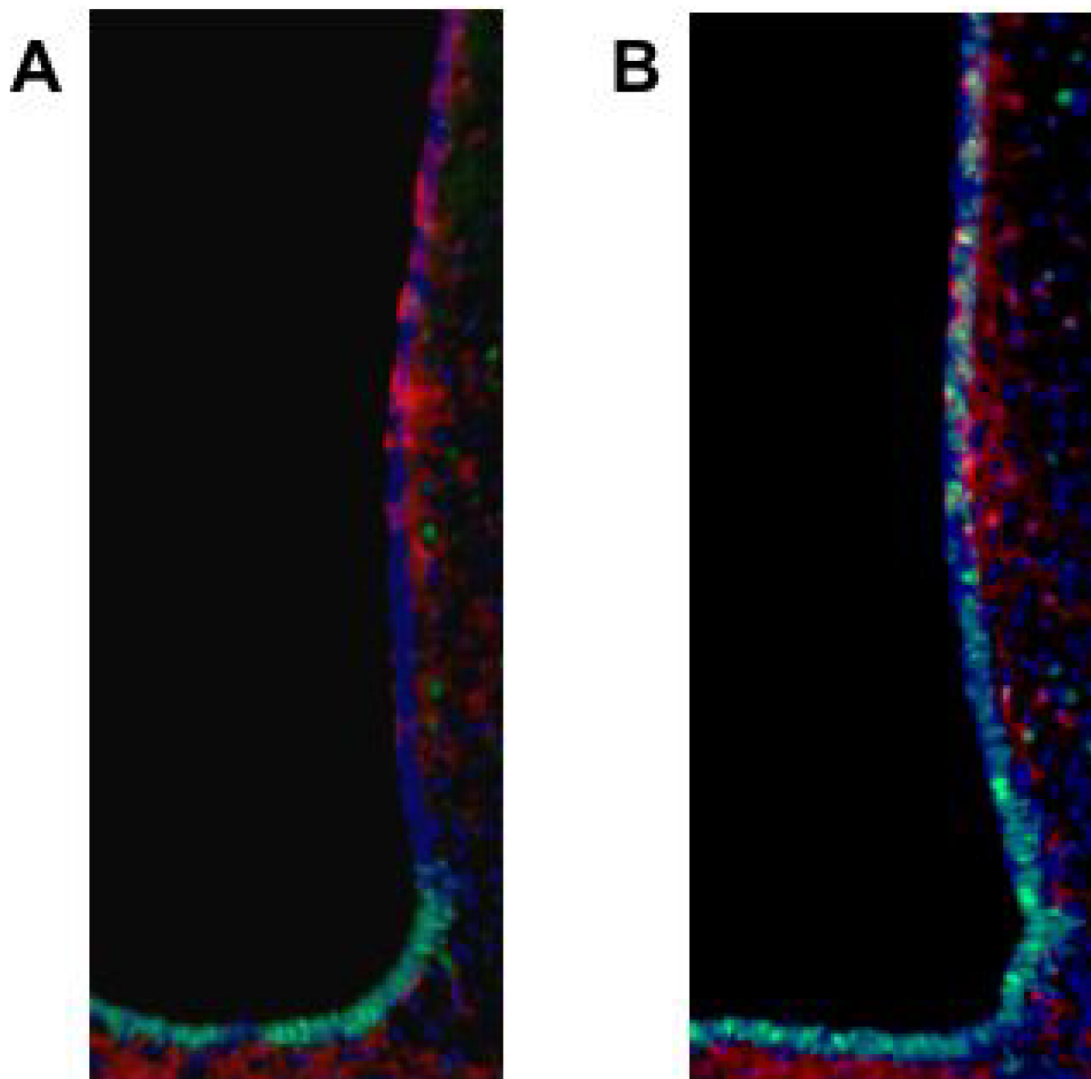

Supplement: DB181175SupplementaryData.pdf [file DB181175SupplementaryData.pdf]
